# Supplementary material
Source: PubMed Central journal article supplement (PMC3271764)
Supplement: supp_pp.111.187674_187674Suppl.pdf [file supp_pp.111.187674_187674Suppl.pdf]

|          | 20 | 40           | 60                                            | 80                                         | 100                                                |                                   |                              |              |                             |      |
|----------|----|--------------|-----------------------------------------------|--------------------------------------------|----------------------------------------------------|-----------------------------------|------------------------------|--------------|-----------------------------|------|
| AtMge1   | :  | -----        | <u>MLVSRVLSRVSR</u> SAGLRSSFSVVTPKRNQIPIVASR  | ----                                       | <u>FHSLVHGTPNKL</u> VAVPVSLRNHGTLDLNVLQRFGFFSSSSAE | : 79                              |                              |              |                             |      |
| AtMge2   | :  | -----        | <u>MLVLRILSRVTR</u> NAGIRSSLSAVTLPARNQTPVFSSR | ----                                       | <u>FHSLAHDFSHKL</u> VPAQM-----SMMDSFALQRFNFSSSTSPE | : 74                              |                              |              |                             |      |
| SlMge1   | :  | -----        | MVLSRISSRFRSNVLTQCRNSLLLYR-QNQQHHVPI          | -----                                      | LSSQFHSIRNIREKVSLVPESALQRFGISSSASPQ                | : 71                              |                              |              |                             |      |
| SlMge2   | :  | -----        | MLVGRISSRFPKSIVAQCRSSLLYSREQQQQQYVPI          | -----                                      | FASEFHSFREFKEKVTLFRESLLQQFRISSSASPQ                | : 72                              |                              |              |                             |      |
| NtMge1   | :  | -----        | MSVSRISSRFRSNVLTQCR-LYYRQQK-QQQQHHLP          | -----                                      | LSSQFHSVRDIKEKVSLLPDSALQWFGISSSASPQ                | : 70                              |                              |              |                             |      |
| NtMge2   | :  | -----        | MSVSRISSRFRRAILNQCRSSVLLYSREQQRQHV            | -----                                      | LAFQFHSRLRDFKEKVSLFHESALQRFGISSSASPQ               | : 72                              |                              |              |                             |      |
| GmMge1   | :  | -----        | MFAYRVLRSSATLSRSFTLFSVSRNSQPFSTNLSNN          | ----                                       | FNSLLHPSPNKLIPVQTNFLNSMNPSTL-SRFGFSSTASHE          | : 77                              |                              |              |                             |      |
| GmMge2   | :  | -----        | MFFHRVLSRVSTNICR-TSLLSASQTPQHLSSFANIN         | ----                                       | LHSLPHSPNKVIPQNLNLLPPINLSAPRFGFSSASTE              | : 77                              |                              |              |                             |      |
| GmMge3   | :  | -----        | MFAYRVLRSSAILRSFTLFSVSRNSQPFSTNLSNN           | ----                                       | FHSLHPSPNKVIPVQTNFLN---SSLT-SRFGFSSTASHE           | : 74                              |                              |              |                             |      |
| PoMge1   | :  | -----        | MLMTRMLSRLSRSVGQRSLHLCSPSQNHLLIPSN            | -----                                      | QFHEYPNKCITSKVCLFHHSVLNSSLFQNFGFTSSASPE            | : 75                              |                              |              |                             |      |
| PoMge2   | :  | -----        | MLMTRMLSRLSRSVGRRSLVLHSPSPSHNHLLPILSYQF       | -----                                      | HSLVHEYGYDPKCITRKVCLFHHSALNSPPFQNFGFTSSASPE        | : 83                              |                              |              |                             |      |
| OsMge1   | :  | -----        | MVAASRLLARASRQCVAAVAASAARRRRCPAAALSLPV        | ----                                       | VTAAKAAAAEPWLGVPYMLNQPLRYSTTIFQRFGFSSTSP           | : 80                              |                              |              |                             |      |
| OsMge2   | :  | -----        | MAAAARLLARISR-QG--VASAAAARRQAEAAALGAS         | ----                                       | AGRHLAPPCSSIKALPLLN-QPRLYSTSTFQRFGFSSSAP           | : 76                              |                              |              |                             |      |
| SbMge1   | :  | -----        | MATARLLARVSRQCAGAVAASSAAGRHRRAPAAASVE         | -----                                      | QFAGSCLSARVPRILNHHFRYSTSIFQKFGFSSVSP               | : 75                              |                              |              |                             |      |
| SbMge2   | :  | MHRFPFFPHNCF | ISLSSPRFRPNK                                  | MAAAARLLTRISKRAVPSVALAGARRRPEAASLLGAS      | ----                                               | VLAAVEP-CASIK                     | VIPLLN-QLAPYSTSAFQRFGFTSAP   | : 102        |                             |      |
| PpMge1   | :  | -----        | MSNAQRSMHYAR                                  | ALLRAFKKEPSRVARGAVRETAPAKPMRECSRPSALQSLRDS | DLHLMNSFQKFR                                       | WASAASPVSHAAPSFESCPSLYSASFSSATSPE | : 99                         |              |                             |      |
| PpMge2   | :  | -----        | MSSSKHARLLFK                                  | AFQKPPQIRCFRAPSSSAPINEKSVFSTKLSGTEFLSPLSKR | WTAFSLHRAVPQ                                       | VSSISNLNSFTHFSSAASPD              | : 86                         |              |                             |      |
| CrMge1   | :  | -----        | MTSLLRVGA                                     | AVLRTCRLEVSP                               | PLMSAQSGLAMPTS                                     | -----                             | RPILQW                       | SRCFATDKD    | : 49                        |      |
| ScMge1   | :  | -----        | MRAFSAATV                                     | RATTRKSFIPMAPRTPFVTPSF                     | TKN                                                | -----                             |                              | : 34         |                             |      |
| EcGrpE   | :  | -----        | -----                                         | -----                                      | -----                                              | -----                             |                              | : -          |                             |      |
| AtCge1   | :  | -----        | MAISFAIDPSIS                                  | PCFSFSSPSSSKTLPLRNNLHFHGRPSPISPLISKPSRK    | FPIFSAHQTN                                         | -----                             |                              | : 62         |                             |      |
| AtCge2   | :  | -----        | MAGLLKTPSL                                    | HLTPTLLHAPSVPFKPFCVVFAGGR                  | -----                                              | NVSVLSRRASL                       | RSVSSGYPLRLLNLVPFASGEAETTETE | VESNEP       | : 81                        |      |
| VvCge1   | :  | -----        | MAFSLSNHLL                                    | FTPKPSKTLALHPPHPSKPI                       | LGFR                                               | LSTSSPILRRSF                      | KPFLALQDSTPYTNNEEEG          | SR           | : 69                        |      |
| VvCge2   | :  | -----        | MATLLRAPFT                                    | APPPQSLTSICTQSPKAFHLSL                     | TR                                                 | -----                             | RCALNPSRLTSS                 | LRFSPI       | LHIRFLRFDPFASNG-EATETQEVQDS | : 78 |
| PoCge1   | :  | -----        | MPLRQCKP                                      | INASLLSSSSPIPINN                           | IKRRSLKTYLAPEDSAPT                                 | TNGKEENN                          | -----                        |              | : 50                        |      |
| PoCge2   | :  | -----        | MATVIKTPPF                                    | SAPRIINNSSLKYANPLCLFSHNNNRSIPN             | FLAKNSLRFPTKPSL                                    | RFVKFVPFSSQGETETTETEETIQE         | -----                        |              | : 84                        |      |
| OsCge1   | :  | -----        | MAATFSAAAA                                    | ASPTYLHRPRTLAPPASTPARLSPSSSR               | PATP                                               | SLSLRRTHAAPP                      | PLRAAA                       | -----        | : 65                        |      |
| OsCge2   | :  | -----        | MAALLRTAA                                     | ALAPPPSPARDPRRPSAASSLAFARRAA               | ARPLRAQPLPPAARRV                                   | PGFVAGPLLRRRPRV                   | GATEADEAAQTATE               | -----        | : 84                        |      |
| SbCge1   | :  | -----        | MAATFCAGP                                     | AASAVANPSSAG-CRRQNLPRAGVLSAC               | WRP                                                | TRPIPAFLSLRRP                     | NAELRPLRVAAGSG               | -----        | : 66                        |      |
| SbCge2   | :  | -----        | MAALLRTAA                                     | ALAPPPSSPLPAREPRGRCLRLACSR                 | RAPARPLRAWLLPTPHV                                  | FCRDGARFRRLAA                     | -----                        | TEADEAAQTATQ | : 77                        |      |
| PpCge1   | :  | -----        | MAALASSA                                      | ATAGMIGQAPRQSTVALRMASRA                    | FVPAQFGVQCLRWRGRV                                  | QVQSSHYRRPV                       | FVAQNSAQTEETE                | VEDVETNEE    | : 83                        |      |
| PpCge2   | :  | -----        | MPAVACTA                                      | AMAGTLIQAPRQSI                             | VSRMASARAFVPAQFGA                                  | CFRWRGVQVQSF                      | FRRLVFNARNSAQ                | TD           | DAKKTEEVAEKKGE              | : 83 |
| CrCge1   | :  | -----        | MQLSSRP                                       | ACVALPRSVQRAAAKPM                          | VARAPVARRFVATRA                                    | EEEEAAAAAP                        | -----                        |              | : 50                        |      |
| Syn_GrpE | :  | -----        | -----                                         | -----                                      | -----                                              | -----                             | -----                        | MNEDQV       | SLENQTNP                    | : 14 |



|          | 120                                                                                                           | 140 | 160 | 180 | 200                                  |       |
|----------|---------------------------------------------------------------------------------------------------------------|-----|-----|-----|--------------------------------------|-------|
| AtMge1   | : PKGNES-----NTEVPKTGETSENVEVGKAT-----                                                                        |     |     |     | DAEIDFDDLRRDDLVLVSEKEDLLKVQQKDIMEMK  | : 141 |
| AtMge2   | : SDEKKT-----HTEASKTSEEKPTAEANQPLDSESKDSVTDSAKRKRKGAKGAASSSESSESDSESDDELSADDLVKLVAEKEELLSEKEEEIKQLK           |     |     |     |                                      | : 166 |
| SlMge1   | : PDEKETSQSQGGGGSG-----AEKASASADSNVQDEKKESDSD-----                                                            |     |     |     | SDLGLEDLSREDLVKYLIEKEELLKMKHEEFQKMQ  | : 144 |
| SlMge2   | : HNEKEASQSQSKPGSTKENGEVSEKCEASVSADSGQDENDESGLASNDNTNENVKRRRRRTKQVSSDSDSLDTEDLSRDDLVKLVAEKEELLKIKDDEFQKMK     |     |     |     |                                      | : 180 |
| NtMge1   | : PNEKETSQSQGEGGST-----TEKASASADSHIQDEKDESD-----                                                              |     |     |     | IDAEDLSRDDLVKLVEKEELLKMKDDEFKRLQ     | : 139 |
| NtMge2   | : PNEKESQSQSEPGSTKENG---DCEASVSADSHVQDEKDES-----                                                              |     |     |     | DTEDLSRDDLVKLVAEKEELLKMKDGEFQKMQ     | : 143 |
| GmMge1   | : H-----ASEGAKVSDQSEQAEAADQTKESD-----                                                                         |     |     |     | VEIECDLSRDDLIKLVAEKEQLLKLKHKEIEKMQ   | : 136 |
| GmMge2   | : NNDKKNRNNVHNGDSTNADPAKANEAKNNDQARQDKPADKTEESGSISSSQ--SQTVKRRRRGFKRTAFSDSDSESECDLSRDDLIKLVAEKEELVMLKHKEIEKMQ |     |     |     |                                      | : 183 |
| GmMge3   | : H-----ASEEAKVSDQSEQAEAADQTKESG-----                                                                         |     |     |     | VESECDLSRDDLIKLVAEKEQLLKLKHKEIEKMQ   | : 133 |
| PoMge1   | : PGEKEHGSAVENDGAPTDVKSEETNGSAKLSDPTKVSVSRETKEG-----                                                          |     |     |     | DAEAVSLSMDDLVLVMEKEELLKEKHKEMETMQ    | : 155 |
| PoMge2   | : PTEKEQGSVDSNCDPTNAESGKTNGSADLSDKTEDSVLHETKESGFNSESQQTISRSVKRRRGTKRTAYSDDSDSEAGSLSMDDLVLVVAEKEELLEAKHKEIETMQ |     |     |     |                                      | : 191 |
| OsMge1   | : S-----DKEENQRKDQENSTNVSNEG-----                                                                             |     |     |     | TEDVDSLKEDLVQLVLEKDGLLKSKDEEINDMK    | : 134 |
| OsMge2   | : DDKAANKQTEDGVNKST-----QSEASNETNSSPGTENASQAG---SQDSVPQSNRRRRGFKRTAFSDSD--TEDLDLSKEDLTKLVLEKEELLKSKDEEVKDMK   |     |     |     |                                      | : 171 |
| SbMge1   | : SDNELKDQE-----RALDESSEDCSSGSENTSEPG-----                                                                    |     |     |     | IEGLDLSKDDLVLVCEKDGLLKSKDDEIKDMK     | : 138 |
| SbMge2   | : DDKETNKHTDDGVNKSVG----VSTEASSEANNVPGTEKAQEAG---SLNSVSWSNRKRRTTKRTAFSDSD--SEDLDSKEDLVKLLLEKDESLSKDEEFKDMK    |     |     |     |                                      | : 199 |
| PpMge1   | : VSGKPGAVGGSTTDAASSEEKVEPIQPCIGDDKGGTGVEQDVKT-----                                                           |     |     |     | DKDLAKENEDLGLLGEREALLEEKDRALTQTK     | : 178 |
| PpMge2   | : VSDKTG-----SPEYSAAEPSRTSTAEGTSESVQH-----                                                                    |     |     |     | AERSNDIKADDLARMVAERDALLQEKDKTIKELQ   | : 150 |
| CrMge1   | : EKKDV-----SGASSDQAAAGEEKPSTSGADG-----                                                                       |     |     |     | ADASADGEPQAQELMSQLKAKEDHATKLTQQVETLT | : 112 |
| ScMge1   | : -----VGSMRMRMFYSDEAKSEESKE-----                                                                             |     |     |     | NNEDLTEEQSEIKKLESQLSAKTKEASELK       | : 85  |
| EcGrpE   | : -----MSSKEQKTPEGQAPEEIMDQHEEIEAVEP-----                                                                     |     |     |     | EASAEQVDPREKVANLEAQLAEAQTRER         | : 59  |
| AtCge1   | : -----NSEEANSKQQADVKTILRSYKQALLNGDET-----                                                                    |     |     |     | SVTEIETMFCKIEKEKNMDQKVLVLSLMSKIASEK  | : 126 |
| AtCge2   | : EETDG-----AVDVENENASAEEGEAEAAAAVITALLKSYKEALADNNEG-----                                                     |     |     |     | KIAEIEASLKSIEDEKFLADKVASLSNELSVER    | : 161 |
| VvCge1   | : -----VKTSKSEADQKPLSVLKSLIKAYKDAVLGDGDK-----                                                                 |     |     |     | AVSEIEAMIDTIESEKAELAQKVSALSAEITSGK   | : 136 |
| VvCge2   | : EIEENS DGYIGGAEDATSDSDAPSDAPNAEEEPASGIIVALRSYKEALVSNDES-----                                                |     |     |     | KAAEIEAFIKFIEDEKIDLEKVAALSEELSSDK    | : 167 |
| PoCge1   | : -----EIQEGQKRGPSLKNLMKIYRQAIIFYGDEK-----                                                                    |     |     |     | TILDIEAKAATIEKENHEFLQKVSLSAEITSGK    | : 113 |
| PoCge2   | : PEIEDSSDGAVEVEDAASSEEVASSEEVADAEDTSSVVMASLRSYKEALASNDES-----                                                |     |     |     | IIAEIEAFLKSVEDEKIDNERKVASLTELSEIEK   | : 173 |
| OsCge1   | : -----ADPKVVNGEDFPPMKDLLRLYKKAFLDGNDE-----                                                                   |     |     |     | ALGGIESAIIAIEKERSNSAAQYESIATEITSGK   | : 130 |
| OsCge2   | : EDSETGETG-----ADDAAAATEETPSVIVTALQSYKEALINDDET-----                                                         |     |     |     | KVAEIEDFLFSIEEEKNSLLSKISTLGAELTTER   | : 159 |
| SbCge1   | : -----VDPKVVNGEDFPPMKDLIQLYRTAFQQGNDE-----                                                                   |     |     |     | VLGEVEKAITAVEKEKSRVASQFESITTEITSGK   | : 131 |
| SbCge2   | : EDSETEVTG-----DSAADDGAGSTDETPSIIVTTLQSYREALINDDEA-----                                                      |     |     |     | KAAEIESFLLSIEDEKNSLLNKITALNAELATQR   | : 155 |
| PpCge1   | : ALAEEE-----SASNDASQSPAEEQSSSIKSLLEAYREAVAADDEG-----                                                         |     |     |     | AISDVESQLEAIANERDSLGLKVNLSLIEEISTNK  | : 159 |
| PpCge2   | : AQVDN-----VSEASAAEETSSSIKSLLEAYREAVAVNDEE-----                                                              |     |     |     | AITDVESQLEAIAIERSLAENANALIGEVSTNK    | : 153 |
| CrCge1   | : -----AEEAAATPLERAKKALDSETLDKDVLT-----                                                                       |     |     |     | ALAELEAEMGRLSAANEANDRAKSLEASLASAK    | : 112 |
| Syn_GrpE | : VSPEASDVPAVTPEESPQPTDAVLGEPGSEQSEDPRIGAAETETEGGPLEQEKSS-----                                                |     |     |     | EEIIAILQKDLASHRQELAEQSEQLDSIK        | : 97  |



|          | 220     | 240    | 260   | 280     | 300     | 320     |        |         |         |         |         |        |        |        |        |       |       |        |        |        |       |       |        |       |     |     |       |       |     |   |       |   |   |    |    |       |   |   |   |   |   |       |       |       |       |       |       |       |   |   |   |       |   |   |   |   |   |   |   |   |   |   |   |       |   |       |   |   |   |   |   |   |       |   |       |   |       |       |       |       |   |   |       |
|----------|---------|--------|-------|---------|---------|---------|--------|---------|---------|---------|---------|--------|--------|--------|--------|-------|-------|--------|--------|--------|-------|-------|--------|-------|-----|-----|-------|-------|-----|---|-------|---|---|----|----|-------|---|---|---|---|---|-------|-------|-------|-------|-------|-------|-------|---|---|---|-------|---|---|---|---|---|---|---|---|---|---|---|-------|---|-------|---|---|---|---|---|---|-------|---|-------|---|-------|-------|-------|-------|---|---|-------|
| AtMge1   | : DKFLR | TYAEQQ | NLMDR | TNRNAES | AKKFAVQ | NFATSLL | VDADN  | LERASSV | VKESFSK | IDTSKD- | LAGATP  | LLKNL  | LEGVEM | TEKQLA | EVFRK  | AGLVK | EDPLN | EPFNP  | NR     | : 248  |       |       |        |       |     |     |       |       |     |   |       |   |   |    |    |       |   |   |   |   |   |       |       |       |       |       |       |       |   |   |   |       |   |   |   |   |   |   |   |   |   |   |   |       |   |       |   |   |   |   |   |   |       |   |       |   |       |       |       |       |   |   |       |
| AtMge2   | : DKVLR | TYAEM  | NVMDR | TRRDA   | ENTKKY  | AVQNF   | AKSLD  | VADNL   | GRASSV  | VKESFSK | LDTSED- | SAGAAP | LLKTL  | LEGVEM | TEKQLA | EVFKK | FGMEK | YDPI   | NEPFD  | PNR    | : 273 |       |        |       |     |     |       |       |     |   |       |   |   |    |    |       |   |   |   |   |   |       |       |       |       |       |       |       |   |   |   |       |   |   |   |   |   |   |   |   |   |   |   |       |   |       |   |   |   |   |   |   |       |   |       |   |       |       |       |       |   |   |       |
| SlMge1   | : DKVLR | TYAEM  | NVMER | TRREA   | ENTKK   | FAIQN   | FVKAL  | LDVSD   | NLGRAS  | SVVKE   | SFKID   | VS     | SKD-   | TTGAV  | PLLK   | TLL   | EGVEM | TDKQLA | EVFKK  | FGVEK  | IDPT  | NEEF  | DPNK   | : 251 |     |     |       |       |     |   |       |   |   |    |    |       |   |   |   |   |   |       |       |       |       |       |       |       |   |   |   |       |   |   |   |   |   |   |   |   |   |   |   |       |   |       |   |   |   |   |   |   |       |   |       |   |       |       |       |       |   |   |       |
| SlMge2   | : EKALR | SYAEM  | NLMNR | TKREA   | ENS     | KKFAIQ  | NFVKAL | LDVAD   | NMGRAS  | SVVKE   | SFKID   | ES     | SKD-   | TVGAV  | PLLN   | TLL   | EGVEM | TDKQLA | EVFKK  | FGVGY  | PTNEE | FDPNK | : 287  |       |     |     |       |       |     |   |       |   |   |    |    |       |   |   |   |   |   |       |       |       |       |       |       |       |   |   |   |       |   |   |   |   |   |   |   |   |   |   |   |       |   |       |   |   |   |   |   |   |       |   |       |   |       |       |       |       |   |   |       |
| NtMge1   | : DKFLR | SYAEM  | NVMER | TKREA   | ENS     | KKFAIQ  | NFVKAL | LDVDP   | NLGRAS  | SVVKE   | SFKID   | AS     | SKD-   | TVGAM  | PLLK   | TLL   | EGVEM | TDKQLA | EVFKK  | FGVEK  | YDPT  | NEQF  | DPNK   | : 246 |     |     |       |       |     |   |       |   |   |    |    |       |   |   |   |   |   |       |       |       |       |       |       |       |   |   |   |       |   |   |   |   |   |   |   |   |   |   |   |       |   |       |   |   |   |   |   |   |       |   |       |   |       |       |       |       |   |   |       |
| NtMge2   | : DKVLR | TYAEM  | NVNR  | TKREA   | ENS     | KKFAIQ  | NFVKAL | LDVSD   | NLGRAS  | SVVKE   | SFKID   | ES     | SKD-   | TAGAV  | PLLK   | TLL   | EGVEM | TDKQLA | EVFKK  | FGVGY  | PTNEE | FDPNK | : 250  |       |     |     |       |       |     |   |       |   |   |    |    |       |   |   |   |   |   |       |       |       |       |       |       |       |   |   |   |       |   |   |   |   |   |   |   |   |   |   |   |       |   |       |   |   |   |   |   |   |       |   |       |   |       |       |       |       |   |   |       |
| GmMge1   | : DKVLR | TYAEM  | NVMDR | TRREA   | ENS     | KKFAIQ  | NFAKSL | LDVAD   | NLGRAS  | SVVKE   | SFKI    | ES     | PEE-   | SSEA   | AELLK  | TLL   | KG    | VE     | TEKQLA | EV     | LKKF  | GVK   | FDPT   | NEP   | FD  | PHM | : 243 |       |     |   |       |   |   |    |    |       |   |   |   |   |   |       |       |       |       |       |       |       |   |   |   |       |   |   |   |   |   |   |   |   |   |   |   |       |   |       |   |   |   |   |   |   |       |   |       |   |       |       |       |       |   |   |       |
| GmMge2   | : DKVLR | TYAEM  | NVMER | TRREA   | DNS     | KKFALQ  | NFAKSL | LDVAD   | NLGRAS  | VATEN   | SFKI    | D      | SSD-   | SAEV   | VKLLK  | TLL   | Q     | VE     | TEKQL  | VE     | LKKF  | GVK   | FDPT   | NEP   | FD  | PHR | : 290 |       |     |   |       |   |   |    |    |       |   |   |   |   |   |       |       |       |       |       |       |       |   |   |   |       |   |   |   |   |   |   |   |   |   |   |   |       |   |       |   |   |   |   |   |   |       |   |       |   |       |       |       |       |   |   |       |
| GmMge3   | : DKVLR | TYAEM  | NVMDR | TRREA   | ENS     | KKFAIQ  | NFAKSL | LDVAD   | NLGRAS  | SVVKN   | SFKI    | ES     | PEE-   | SSEA   | AQLLK  | TLL   | EG    | VEM    | TEKQLA | EV     | LKKF  | GVK   | FDPT   | NEP   | FD  | PHM | : 240 |       |     |   |       |   |   |    |    |       |   |   |   |   |   |       |       |       |       |       |       |       |   |   |   |       |   |   |   |   |   |   |   |   |   |   |   |       |   |       |   |   |   |   |   |   |       |   |       |   |       |       |       |       |   |   |       |
| PoMge1   | : DKVLR | TYAEM  | NVKER | TKREA   | ENS     | KKFAIQ  | NFAKSL | LDVAD   | NLGRAS  | SVVKN   | SFKI    | I      | VSN    | -AADV  | VPLLK  | TLL   | EG    | VEM    | TEKQLG | EV     | FKKY  | GVK   | FDPT   | NEP   | FD  | PHR | : 262 |       |     |   |       |   |   |    |    |       |   |   |   |   |   |       |       |       |       |       |       |       |   |   |   |       |   |   |   |   |   |   |   |   |   |   |   |       |   |       |   |   |   |   |   |   |       |   |       |   |       |       |       |       |   |   |       |
| PoMge2   | : DKVLR | TYAEM  | NVKER | TKREA   | ENS     | KKFAIQ  | NFAKSL | LDVAD   | NLGRAS  | SVVKN   | SFKI    | I      | VSN    | -TAQV  | VPLLK  | TLL   | EG    | VEM    | TEKQLG | EV     | FKKY  | GVK   | FDPT   | NEP   | FD  | PHR | : 298 |       |     |   |       |   |   |    |    |       |   |   |   |   |   |       |       |       |       |       |       |       |   |   |   |       |   |   |   |   |   |   |   |   |   |   |   |       |   |       |   |   |   |   |   |   |       |   |       |   |       |       |       |       |   |   |       |
| OsMge1   | : DKVLR | SYAEM  | NVIAR | TKRES   | ENS     | KKYAVQ  | NFSKSL | LDVAD   | NLRAS   | SVVKE   | SFKI    | D      | TS     | SKD-   | STGAV  | PLLK  | TLL   | EG     | VDM    | TDKQLG | EV    | FKKF  | GVK    | FDPL  | NEK | FD  | PSR   | : 241 |     |   |       |   |   |    |    |       |   |   |   |   |   |       |       |       |       |       |       |       |   |   |   |       |   |   |   |   |   |   |   |   |   |   |   |       |   |       |   |   |   |   |   |   |       |   |       |   |       |       |       |       |   |   |       |
| OsMge2   | : DKVLR | SYAEM  | NVIAR | TKRES   | DNA     | KYAVQ   | GFSKSL | LDVAD   | NLRAS   | SVVKE   | SFKI    | D      | SNE-   | SAE    | VKLLN  | TLL   | EG    | VEM    | TEKQLG | EV     | FKKF  | GVK   | FDPL   | NEK   | FD  | PNK | : 278 |       |     |   |       |   |   |    |    |       |   |   |   |   |   |       |       |       |       |       |       |       |   |   |   |       |   |   |   |   |   |   |   |   |   |   |   |       |   |       |   |   |   |   |   |   |       |   |       |   |       |       |       |       |   |   |       |
| SbMge1   | : DKVLR | SYAEM  | NVIAR | TKRES   | ENS     | KKYAVQ  | NFAKSL | LDVAD   | NLRAS   | SVVKE   | SFKI    | D      | AS     | SKD-   | SAGAI  | PLLK  | TLL   | EG     | VDM    | TEKQLA | EV    | FKKF  | GVK    | FDPL  | NEK | FD  | PNR   | : 245 |     |   |       |   |   |    |    |       |   |   |   |   |   |       |       |       |       |       |       |       |   |   |   |       |   |   |   |   |   |   |   |   |   |   |   |       |   |       |   |   |   |   |   |   |       |   |       |   |       |       |       |       |   |   |       |
| SbMge2   | : DKVLR | SYAEM  | NVLAR | TKRES   | ENT     | KKYIQ   | SFSKSL | LDVAD   | NLRAS   | SVVKE   | SFKI    | D      | CS     | NN-    | SDEA   | VPLLK | TLL   | EG     | VEM    | TEKQLG | EV    | FKKF  | GVK    | FDPL  | NEK | FD  | PNR   | : 306 |     |   |       |   |   |    |    |       |   |   |   |   |   |       |       |       |       |       |       |       |   |   |   |       |   |   |   |   |   |   |   |   |   |   |   |       |   |       |   |   |   |   |   |   |       |   |       |   |       |       |       |       |   |   |       |
| PpMge1   | : DKLLR | SYAEM  | NLIDR | TRREA   | E       | STRKYS  | IQD    | FAQSL   | LDVAD   | NLGRA   | LET     | VRK    | S      | ADDAE  | I      | ----  | AKLL  | V      | SL     | LEG    | VEM   | TDKLM | KV     | F     | E   | K   | H     | L     | TRF | N | PEG   | I | V | DP | NE | : 281 |   |   |   |   |   |       |       |       |       |       |       |       |   |   |   |       |   |   |   |   |   |   |   |   |   |   |   |       |   |       |   |   |   |   |   |   |       |   |       |   |       |       |       |       |   |   |       |
| PpMge2   | : DKVLR | GYA    | EVEN  | MAR     | REA     | E       | STRK   | FALQ    | GFAKSL  | LDVAD   | NLGRAT  | GAV    | PEN    | LRKLD  | ST     | LED   | SSGA  | KVL    | I      | TLL    | Q     | VE    | TEKQLQ | QV    | F   | R   | Q     | N     | G   | L | E     | F | E | S  | E  | G     | K | E | F | D | P | NY    | : 258 |       |       |       |       |       |   |   |   |       |   |   |   |   |   |   |   |   |   |   |   |       |   |       |   |   |   |   |   |   |       |   |       |   |       |       |       |       |   |   |       |
| CrMge1   | : DSLKR | TLAEM  | NLRAR | TARE    | VD      | S       | KKFAIQ | G       | FVKS    | LDVDP   | NLERAA  | S      | V      | PSEAL  | K      | E     | D     | G      | G      | V      | P     | E     | K      | L     | R   | N   | L     | A     | G   | L | L     | E | G | V  | R  | A     | T | E | S | I | L | H     | K     | V     | L     | K     | Q     | N     | G | V | E | R     | Y | D | A | A | G | Q | P | D | P | N | L | : 219 |   |       |   |   |   |   |   |   |       |   |       |   |       |       |       |       |   |   |       |
| ScMge1   | : DRLLR | SVADF  | RNLQ  | VTK     | KDI     | Q       | KAKDF  | ALQ     | FAKDL   | LES     | V       | D      | N      | F      | G      | H     | AL    | N      | F      | K      | E     | E     | D      | L     | Q   | S   | K     | E     | I   | S | ----- | D | L | Y  | T  | G     | V | R | M | R | D | V     | F     | E     | N     | T     | L     | R     | K | H | G | I     | E | K | L | D | P | L | G | E | P | D | P | N     | K | : 183 |   |   |   |   |   |   |       |   |       |   |       |       |       |       |   |   |       |
| EcGrpE   | : DGILR | VKAEM  | NLRRR | TELD    | IE      | KA      | H      | F       | A       | L       | E       | K      | F      | I      | N      | E     | L     | L      | P      | V      | I     | D     | S      | L     | D   | R   | A     | L     | E   | V | A     | D | K | A  | N  | P     | D | S | A | M | V | E     | ----- | G     | I     | E     | L     | T     | L | K | S | M     | L | D | V | V | R | K | F | G | V | E | I | A     | E | T     | N | V | P | L | D | P | N     | V | : 153 |   |       |       |       |       |   |   |       |
| AtCge1   | : EMKIR | LQADF  | DNTR  | KKL     | D       | K       | R      | L       | S       | T       | E       | S      | N      | A      | K      | V     | I     | L      | K      | S      | L     | L     | P      | I     | I   | D   | S     | F     | E   | K | A     | L | Q | V  | R  | V     | T | D | K | E | K | I     | D     | T     | ----- | S     | Y     | Q     | I | Y | R | Q     | F | E | V | L | R | Y | L | R | V | S | V | I     | A | T     | V | G | K | P | D | P | L     | L | : 220 |   |       |       |       |       |   |   |       |
| AtCge2   | : DRLIR | ISAD   | FDNFR | KRTER   | ER      | LN      | L      | V       | S       | N       | A       | Q      | G      | E      | V      | N     | L     | L      | A      | V      | L     | D     | N      | F     | E   | R   | A     | K     | S   | Q | I     | K | V | E  | T  | E     | G | E | E | K | V | T     | N     | ----- | S     | Y     | Q     | S     | I | Y | K | F     | V | E | I | L | G | S | L | G | V | I | H | V     | E | T     | V | G | K | F | D | P | M     | L | : 255 |   |       |       |       |       |   |   |       |
| VvCge1   | : EKYIR | LQADF  | DNFR  | KRSE    | KER     | L       | T      | V       | R       | T       | A       | Q      | G      | E      | V      | S     | L     | L      | P      | M      | I     | D     | N      | F     | E   | R   | A     | K     | Q   | I | K     | P | E | T  | E  | K     | E | K | I | D | T | ----- | S     | Y     | Q     | G     | I     | Y     | K | F | V | E     | I | M | R | S | C | H | V | A | A | V | A | T     | V | G     | K | P | D | P | A | L | : 230 |   |       |   |       |       |       |       |   |   |       |
| VvCge2   | : ERILR | ISAD   | FDNFR | KRTR    | D       | R       | E      | L       | S       | L       | V       | T      | N      | A      | Q      | G     | E     | V      | L      | N      | L     | L     | P      | V     | L   | D   | N     | F     | E   | R | A     | K | A | I  | K  | V     | E | T | E | G | E | E     | K     | I     | N     | ----- | S     | Y     | Q | S | I | Y     | K | F | V | E | I | L | G | S | L | G | V | T     | P | V     | E | T | I | G | N | P | D     | P | L     | F | : 261 |       |       |       |   |   |       |
| PoCge1   | : EKYIR | LQADF  | DNFR  | KRS     | D       | K       | E      | R       | V       | N       | I       | R      | S      | D      | A      | Q     | G     | E      | V      | I      | E     | S     | L      | L     | P   | M   | V     | D     | S   | F | E     | R | A | K  | Q  | I     | K | P | E | T | E | K     | E     | K     | I     | D     | S     | ----- | S | Y | Q | G     | I | Y | K | Q | L | V | D | I | M | R | N | L     | Q | V     | A | A | V | P | T | V | G     | K | P     | D | P     | S     | L     | : 207 |   |   |       |
| PoCge2   | : ERVLR | ISAD   | FDNFR | KRTER   | ER      | L       | S      | L       | V       | T       | N       | A      | Q      | G      | E      | V     | N     | L      | L      | S      | V     | L     | D      | N     | F   | E   | R     | A     | K   | T | I     | K | T | A  | T  | E     | G | E | E | K | I | N     | ----- | S     | Y     | Q     | N     | I     | Y | K | F | M     | E | I | L | V | S | L | G | V | P | V | E | T     | I | G     | K | P | D | P | M | L | : 267 |   |       |   |       |       |       |       |   |   |       |
| OsCge1   | : DKFLR | INAD   | LENFR | KQTE    | K       | E       | R      | A       | R       | F       | T       | S      | N      | I      | Q      | V     | D     | V      | Q      | S      | L     | L     | T      | L     | V   | D   | S     | F     | E   | K | V     | N | Q | E  | I  | T     | P | E | T | D | K | E     | Q     | T     | I     | S     | T     | ----- | S | Y | Q | G     | I | Y | K | L | V | E | T | L | R | S | L | G     | V | G     | V | E | T | V | G | K | P     | D | P     | S | I     | : 224 |       |       |   |   |       |
| OsCge2   | : DRILR | ISAD   | FDNFR | KR      | V       | E       | R      | E       | K       | L       | S       | M      | T      | N      | V      | Q     | G     | E      | V      | I      | E     | S     | L      | L     | P   | V   | L     | D     | N   | F | E     | R | A | K  | T  | I     | K | V | E | T | E | Q     | E     | T     | K     | I     | N     | ----- | S | Y | Q | S     | I | Y | K | F | I | D | I | L | N | S | L | G     | V | E     | D | V | E | T | V | G | K     | P | D     | P | M     | L     | : 253 |       |   |   |       |
| SbCge1   | : EKFI  | R      | NAD   | LENFR   | KQTE    | K       | R      | A       | K       | F       | T       | S      | N      | M      | R      | V     | V     | Q      | S      | L      | L     | P     | L      | V     | D   | S   | F     | E     | K   | T | N     | L | E | N  | T  | P     | E | T | E | K | E | Q     | K     | I     | S     | T     | ----- | S     | Y | Q | G | I     | Y | K | L | V | E | T | L | R | Y | L | G | V     | G | V     | E | T | V | G | K | P | D     | P | S     | V | : 225 |       |       |       |   |   |       |
| SbCge2   | : ERILR | ISAD   | FDNFR | KRT     | E       | N       | E      | K       | L       | N       | M       | E      | N      | V      | Q      | G     | E     | L      | I      | E      | S     | F     | L      | P     | V   | L   | D     | N     | F   | E | R     | A | K | M  | I  | K     | V | E | T | E | G | E     | E     | K     | I     | N     | ----- | S     | Y | Q | S | I     | Y | K | F | I | E | I | L | N | S | L | G | V     | E | D     | V | E | T | V | G | K | P     | D | P     | M | L     | : 249 |       |       |   |   |       |
| PpCge1   | : DRYLR | L      | NAD   | FDNFR   | KRS     | E       | R      | L       | A       | T       | A       | G      | N      | R      | G      | E     | V     | I      | E      | S      | L     | L     | P      | M     | V   | D   | N     | F     | E   | R | A     | K | T | S  | I  | K     | T | E | T | E | A | E     | Q     | K     | I     | D     | N     | ----- | A | Y | Q | G     | I | Y | K | F | V | E | I | M | K | S | L | G     | V | A     | V | E | T | V | G | K | P     | D | P     | N | L     | : 253 |       |       |   |   |       |
| PpCge2   | : DRYIR | L      | NAD   | FDNFR   | KRS     | E       | R      | L       | A       | T       | A       | G      | N      | R      | G      | E     | V     | S      | L      | L      | P     | I     | V      | D     | N   | F   | E     | R     | A   | K | T     | S | I | K  | T  | E     | T | E | G | E | Q | K     | I     | D     | N     | ----- | A     | Y     | Q | S | I | Y     | K | F | V | E | I | M | K | S | L | G | V | A     | I | E     | T | V | G | K | S | F | D     | P | N     | L | : 247 |       |       |       |   |   |       |
| CrCge1   | : DQYLR | L      | NAD   | FDNFR   | R       | R       | T      | R       | E       | S       | A       | A      | L      | T      | D      | S     | V     | R      | G      | D      | V     | I     | K      | E     | M   | L   | P     | I     | V   | D | N     | F | E | L  | A  | R     | T | Q | V | K | A | E     | T     | E     | A     | E     | Q     | K     | I | N | N | ----- | S | Y | Q | G | L | Y | K | M | V | D | L | M     | R | T     | Q | G | V | E | A | V | P     | T | T     | G | T     | P     | D     | P     | N | I | : 206 |
| Syn_GrpE | : KRYVA | LAAE   | FDNFR | KRT     | Q       | R       | E      | K       | E       | Q       | A       | L      | I      | K      | G      | R     | T     | I      | T      | E      | L     | L     | P      | V     | D   | N   | F     | E     | R   | A | T     | Q | I | K  | P  | N     | S | D | G | E | N | Q     | I     | H     | K     | ----- | S     | Y     | Q | G | V | Y     | K | N | L | V | D | S | L | K | G | L | G | V     | A | P     |   |   |   |   |   |   |       |   |       |   |       |       |       |       |   |   |       |



|          | 340                                                                                          | 360 | 380 | 400 |       |
|----------|----------------------------------------------------------------------------------------------|-----|-----|-----|-------|
| AtMge1   | : HNAVFQVPDASKPKGTIAHVLKSGYSLYDRVIRPAEVGVTCAVENQEGGKESAA-----                                |     |     |     | : 302 |
| AtMge2   | : HNAVFQVPDASKPEGTVAHVLKSGYTLYDRVIRPAEVGVTQGGENQEEKKESDA-----                                |     |     |     | : 327 |
| SlMge1   | : HNAVFQVPDPEKAPGMIAVCLKPGYSLHGRIIRPAEVGVTVAVESTGN-----                                      |     |     |     | : 299 |
| SlMge2   | : HNAVFQVPDPKRNPGMVAVCLKSGYTLHDRIIRPAEVGVTVAMVKQVG-----                                      |     |     |     | : 335 |
| NtMge1   | : HNAVFQVPDPEKAPGVIAVCLKPGYTLHDRIIRPAEVGVTVAVETEADQSTNT-----                                 |     |     |     | : 299 |
| NtMge2   | : HNAIFQVPDPKAPGVVAVCLKSGYTLHERIRPAEVGVTVAVESTQADQNTEA-----                                  |     |     |     | : 304 |
| GmMge1   | : HNAIFQIPDASKAPGTGVVVLKAGYMLYDRVLRPAEVGVTQEVEDN-----                                        |     |     |     | : 289 |
| GmMge2   | : HNAIFQIPDGSKPPGTVAAVLKAGYMLYDRVIRPAEVGVTTHANRG-----                                        |     |     |     | : 335 |
| GmMge3   | : HNAIFQIPDASKAPGTGVVVLKAGYKLYDRVLRPAEVGVTQEVEDNKAEE-----                                    |     |     |     | : 290 |
| PoMge1   | : HNAIFQVPDALKPPGIVAAVLKAGYMLHERVIRPAEVGVTTRAVEKDL-----                                      |     |     |     | : 309 |
| PoMge2   | : HNAIFQVPDASKPPGTVAAVLKAGYMLHDRVIRPAEVGVTQEVENGAEANE-----                                   |     |     |     | : 349 |
| OsMge1   | : HCAIFQIPDPSKPSGTVASVVKGYMLHDRVLRPAEVGVTTEGGPTTTEEAENSEQKSSEV-----                          |     |     |     | : 302 |
| OsMge2   | : HAALFQIPDPSKPSGTVAAVVKGYMLHDRVLRPAEVGVTTEGGPIEEEPEEKSDKSD-----                             |     |     |     | : 335 |
| SbMge1   | : HCAVFQIPDPSKPSGTVASVVKGYMLHDRVLRPAEVGVTAGGADATEEAQPEEKTARD-----                            |     |     |     | : 305 |
| SbMge2   | : HYAFFQIPDPSKPSGTVAAVVKGYMLHDRVLRPAEVGVTTEGGPTEEPPEEKSS-----                                |     |     |     | : 359 |
| PpMge1   | : HQAVFEVEDANKTPGTVAIVLKTGYKLHDRVIRPAVVGIVKENSE-----                                         |     |     |     | : 326 |
| PpMge2   | : HSAMFELEDETKTPGTVAIVTKVGYLLHDRVIRPAEVGVVIAKAKE-----                                        |     |     |     | : 302 |
| CrMge1   | : HNALFDIPDPTKENNTIAVVTKKGYKLNDRVIRPAEVGVVRNVSS-----                                         |     |     |     | : 264 |
| ScMge1   | : HEATFELPQPDKEPGTVFHVQQLGFTLNDRVIRPAKVGIVKGEEN-----                                         |     |     |     | : 228 |
| EcGrpE   | : HQAIAMVESDDVAPGNVLGIMQGYTLNGRTIRAAMVTVAKAKA-----                                           |     |     |     | : 197 |
| AtCge1   | : HEAISREESEAVKAGIITEELNKGFLGDRVLRPAKVKVSLGPVNKKTPSAAEEITPSA-----                            |     |     |     | : 279 |
| AtCge2   | : HEAIMREDSAEYEEGIVLEEYRKGFLGERLLRPSMVKVSAGPGPEKPLEAEEGEATAQGSAAEESSSS-----                  |     |     |     | : 324 |
| VvCge1   | : HEAIAREESQEFKEGIIIQEIRRGFLLGDRLLRPAWKVSTGPGRKKTSAVADKSTGQPATAAGVDER-----                   |     |     |     | : 298 |
| VvCge2   | : HEAIMREDSTEFEEVDVIIQEFRKGFKLGDRLRPSMVKVSAGPGPAKAEAVGSSEEEAVRVTTETETSGEGTPEGESG-----        |     |     |     | : 338 |
| PoCge1   | : HEAIAREESQEQYKEGIIIQEFRRGFLIGNRLRPAWKVSSSGPGNKSSVGTETRAEQPATAAGMD-----                     |     |     |     | : 273 |
| PoCge2   | : HEAIMRESDAFEEGTVLEEYRKGFKLGDRLRPSMVKVSAGPGPVKPEQVEESQEEAEATSGTSEGGSTEEESA-----             |     |     |     | : 342 |
| OsCge1   | : HEAIAREESHQFKAGIVSHEVRRGFLLRERLLRPAIVKVSSTGSGTQETSSPSTTEKPVEDSKEDAAV-----                  |     |     |     | : 290 |
| OsCge2   | : HEAIMREESVEYEEGVILQEFRKGFKLGERLLRPAWKVVSAGPGPEKPVYDDPAMVEDSVAPQVKVEAEDDGFDDDAE-----        |     |     |     | : 332 |
| SbCge1   | : HEAISREASMQFKAGIVMHEVRRGFHLKERLLRPAIVKVSSTGSGKQSASS-----                                   |     |     |     | : 275 |
| SbCge2   | : HEAIMREDSSEYEEGIIIQEFRKGFKLGERLLRPAWKVVSAGPGPEVSAGPGPEVSRDDDPVVEDSVAPQKIEDVEDDGVGDGAE----- |     |     |     | : 335 |
| PpCge1   | : HEAIMREDSTEFADVVSQEFRRGFRIGDRLLRPAWKVSSSGPGAAAATDLDLPIEEALANE-----                         |     |     |     | : 315 |
| PpCge2   | : HEAIMREDSTEFADIVSQEFRRGFRIEDRLRPAWKVSSSGPGPAADTDLPIEESLANE-----                            |     |     |     | : 307 |
| CrCge1   | : HDAIMREPSNSHPDGTVLQEFRKGFAIGGKLRPAWKVSYTEDGPAASSEE-----                                    |     |     |     | : 258 |
| Syn_GrpE | : HEAMLREPTAEYPEDTVIEELVRGYLLDDIVLRHSMVKVAVAPEEGAEEVVNGEAGANP-----                           |     |     |     | : 249 |

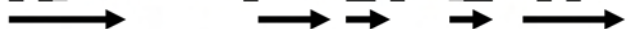

**Fig. S1 Protein sequence alignment of Mge homologs.** The gray bar on top of the alignment indicates the section of aligned Mge/Cge sequences used to generate the phylogenetic tree. Solid underlines indicate the sequence segments removed as mTP for long form constructs of AtMges. Dotted underlines indicate the sequence segments, in addition to the solid underlined portion, removed as mTP for short form constructs. The stretch of stars indicates the amino acid sequence derived from retained intron 2 of the AS form of Mge in several plant species. Note that for Arabidopsis, this segment resembles intron 2, but does not splice out to form isoform. For tomato and poplar, the segments are predicted to be retained intron 2; further investigation is required for confirmation. The cylinders and arrows at the bottom of the alignment indicate the alpha helixes and beta sheets, respectively, in E. coli GrpE, as shown in Harrison et al., 1997. Accession numbers of each sequence are as followed: AtMge1: At5g55200; AtMge2: At4g26780; SlMge1: TC226893; SlMge2: TC233922; NtMge1: AF09863; NtMge2: AP09863; GmMge1: Glyma08g43430.1; GmMge2: Glyma02g46390.1; GmMge3: Glyma18g10120.1; PoMge1: TC156480; PoMge2: TC162523; OsMge1: LOC\_Os09g11250.1; OsMge2: LOC\_Os08g25090.1; SbMge1: Sb02g019590.1; SbMge2: Sb07g017190.1; PpMge1: Pp1s194\_146V2.1; PpMge2: Pp1s162\_160V2.1; CrMge1: Au9.Cre08.g370450; ScMge1: NP\_014875.1; EcGrpE: X07863.1; AtCge1: AT1G36390.1; AtCge2: AT5G17710.1; VvCge1: GSVIVT01008951001; VvCge2: GSVIVT01029905001; PoCge1: POPTR\_0002s09060.1; PoCge2: POPTR\_0013s06430.1; OsCge1: LOC\_Os04g35180.2; OsCge2: LOC\_Os02g39870.1; SbCge1: Sb06g016920.1; SbCge2: Sb04g025770.1; PpCge1: Pp1s372\_19V6.1; PpCge2: Pp1s273\_60V6.1; CrCge1: XM\_001692360.1; Syn GrpE: NP\_442221.

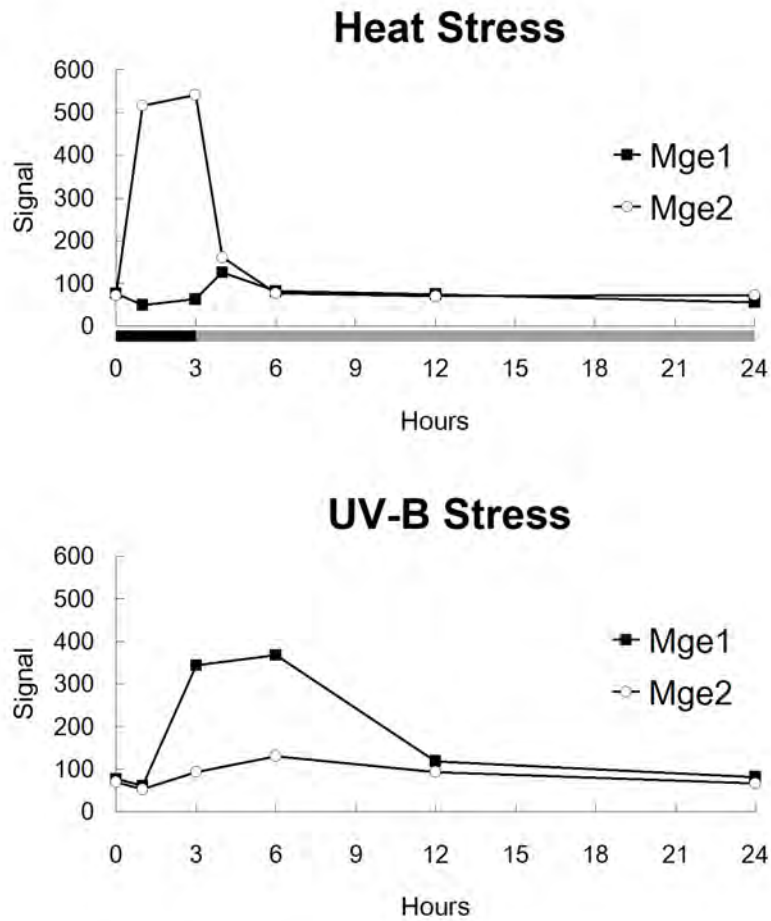

**Fig. S2** *In silico* analysis of the expression of *Arabidopsis Mges*. Data were obtained and organized from the public microarray data concerning the transcript expression of *Mge1* and *Mge2* under HS or UV-B stress. The black bar underneath the x-axis indicates heat treatment period at 38°C, while the gray bar indicates the recovery period at 25°C following a 3-h heat treatment. For, UV-B treatment, the plants were exposed to 15 min of irradiation and the expression was determined during recovery.

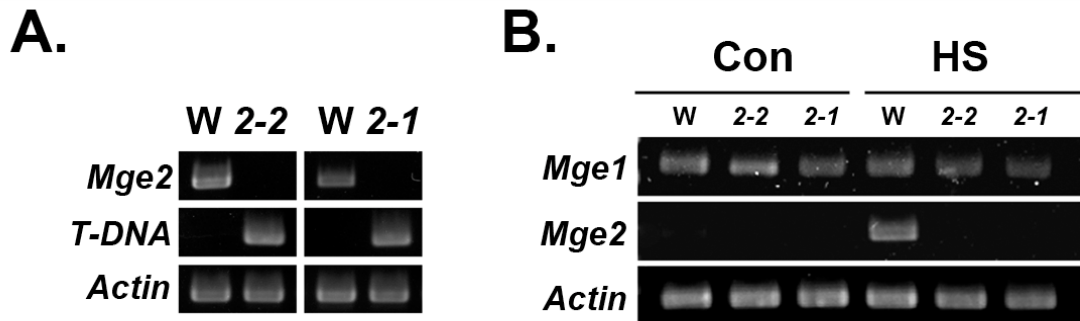

**Fig. S3 Molecular characterization of *mge2-1* and *mge2-2* T-DNA insertion lines.**

(A) PCR analyses of the genomic DNA of the wild-type and *mge2* KO lines. Presence of T-DNA was detected by use of T-DNA left border primer and gene specific flanking primer as shown in **Table S1**. (B) The RT-PCR products of *Mge1* and *Mge2* derived from the wild type or the *Mge* mutants without (Con) or with (HS) heat treatment at 37°C for 1 h. W: wild type; 2-1: *mge2-1*; 2-2: *mge2-2*.

**Table S1. List of primers used in this study.**

| Gene/Allele                                            | Direction | Sequence (5' to 3')                                                                      | Tm°C         |
|--------------------------------------------------------|-----------|------------------------------------------------------------------------------------------|--------------|
| <b>Construct Primers for DA16 Complementation</b>      |           |                                                                                          |              |
| <i>AtMge1</i> (short form)                             | Forward   | GTTGGTCTCCAATGCATGGAAGCTCTAGATTTGAATGTTCTTC                                              | 55.1         |
|                                                        | Reverse   | GTTGGTCTCCGCGCTTCAAGCTGCAGACTCTTTGCCG                                                    | 59.3         |
| <i>AtMge1</i> (long form)                              | Forward   | GTTGGTCTCCAATGCAGACTCCCTCGTTCACGGAACC                                                    | 58.0         |
|                                                        | Reverse   | GTTGGTCTCCGCGCTTCAAGCTGCAGACTCTTTGCCG                                                    | 59.3         |
| <i>AtMge2</i> (short form)                             | Forward   | GTTGGTCTCCAATGTCTATGATGGATTGTTTGCAC                                                      | 51.9         |
|                                                        | Reverse   | GTTGGTCTCCGCGCTTAAAGCATCAGACTCTTTCTTTCTTCTTG                                             | 57.6         |
| <i>AtMge2</i> (long form)                              | Forward   | GTTGGTCTCCAATGCAGACTCCCTAGCTCACGATTCTCG                                                  | 58.2         |
|                                                        | Reverse   | GTTGGTCTCCGCGCTTAAAGCATCAGACTCTTTCTTTCTTCTTG                                             | 57.6         |
| <b>Construct Primers for Mitochondria Localization</b> |           |                                                                                          |              |
| <i>AtMge2</i>                                          | Forward   | ATGTTGGTTTTGAGAATTTGTGCGC                                                                | 57.4         |
|                                                        | Reverse   | GGATCCAGCATCAGACTCTTTCTTTCTTC                                                            | 61.9         |
| <b>RT-PCR Primers</b>                                  |           |                                                                                          |              |
| <i>AtActin</i>                                         | Forward   | CGCTCTTTCTTTCCAAGCTCAT                                                                   | 54.6         |
|                                                        | Reverse   | GTAGTCAACAGCAACAAAGGAGAGC                                                                | 55.5         |
| <i>AtHsa32</i>                                         | Forward   | AAAGACTATGTGGAGGAGTG                                                                     | 42.9         |
|                                                        | Reverse   | CACATAGAGATTACATTTG                                                                      | 39.6         |
| <i>AtHsp101</i>                                        | Forward   | CACCAGGGTATGTTGGTACG                                                                     | 55.0         |
|                                                        | Reverse   | GCACCATACACCGGTCATAA                                                                     | 54.6         |
| <i>AtMge1</i>                                          | Forward   | GCTGAACCGAAGGAAATGAGAGTAAC                                                               | 60.5         |
|                                                        | Reverse   | GGAAGCATCTGGGACTTGAACACTG                                                                | 62.8         |
| <i>AtMge2</i>                                          | Forward   | ATGTTGGTTTTGAGAATTTGTGCGC                                                                | 57.4         |
|                                                        | Reverse   | TCTTTCTTCTTGGTCTCTCCTCC                                                                  | 55.5         |
| <i>AtmtHsc70-2</i>                                     | Forward   | CAGATGCCTTTCAAGCAGTGG                                                                    | 54.8         |
|                                                        | Reverse   | TATTCGAGGTGAAAGCCACCA                                                                    | 54.6         |
| <i>AtsHsp18.1</i>                                      | Forward   | ACGAACAATGTCTCTCATTG                                                                     | 43.5         |
|                                                        | Reverse   | CTTCATATTCATTAGCCCC                                                                      | 46.0         |
| <i>SlActin</i>                                         | Forward   | GTTGCTATTGAGGCTGTGCTTTCTTG                                                               | 61.2         |
|                                                        | Reverse   | CCAATCATGGATGGCTGGAAGAGG                                                                 | 62.4         |
| <i>SlMge1</i>                                          | Forward   | CAAGGTGGAGGAGGAAGCGGAG                                                                   | 60.9         |
|                                                        | Reverse   | CACACCAACTTCAGCAGGTCGG                                                                   | 59.1         |
| <i>SlMge2</i>                                          | Forward   | CCTCTGCATCCCCTCAGCATAATG                                                                 | 60.6         |
|                                                        | Reverse   | CAGCGACCATGCCAGGATTCC                                                                    | 61.1         |
| <b>Primers for Genotyping</b>                          |           |                                                                                          |              |
| <i>mge2-1</i>                                          | Forward   | GCTCACGATTTCTCGCATAAG                                                                    | 51.9         |
|                                                        | Reverse   | TGTTTAACCGGTCTCATCTGC                                                                    | 51.8         |
| <i>mge2-2</i>                                          | Forward   | CACCTCAGAAGATTCTGCTGG                                                                    | 51.4         |
|                                                        | Reverse   | GCGGTTTTCGCATACTAC                                                                       | 51.7         |
| <i>T-DNA</i>                                           | Forward   | ATTTTGCCGATTTCCGGAAC                                                                     | 51.7         |
|                                                        | Reverse   | TGTTTAACCGGTCTCATCTGC (for <i>mge2-1</i> )<br>CACCTCAGAAGATTCTGCTGG (for <i>mge2-2</i> ) | 51.8<br>51.4 |
